# Supplementary material for: Improved protocols for isolation of Mycobacterium ulcerans from clinical samples
Source: Springer Nature journal article supplement (doi:10.1186/s12866-025-03835-6), 2025-03-05
Supplement: MOESM1 [file 12866_2025_3835_MOESM1_ESM.docx]

|  | **Tika-MGIT** | | | **Mu16S rRNA result** | | | **Mu 16S rRNA result** | **Final Tika-MGIT result** | **Final culture result** |
| --- | --- | --- | --- | --- | --- | --- | --- | --- | --- |
| Participant ID | Week 0 | Week 2 | Week 4 | Week 0 | Week 2 | Week 4 |  |  |  |
| BUCP1 | - | - | + | + | + | + | + | + | + |
| BUCP2 | + | + | - | + | + | + | + | + | + |
| BUCP3 | - | ND | ND | + | ND | ND | + | - | + |
| BUCP4 | - | - | ND | - | - | ND | - | - | - |
| BUCP5 | + | + | - | - | + | + | + | + | + |
| BUCP6 | - | ND | ND | - | ND | ND | - | - | - |
| BUCP7 | - | ND | ND | - | ND | ND | - | - | - |
| BUCP8 | + | + | - | - | + | + | + | + | + |
| BUCP9 | - | - | - | - | + | + | + | - | + |
| BUCP10 | + | - | ND | + | + | ND | + | + | + |
| BUCP11 | - | ND | ND | - | ND | ND | - | - | - |
| BUCP12 | - | ND | ND | - | ND | ND | - | - | - |
| BUCP13 | + | - | + | + | + | + | + | + | + |
| BUCP14 | - | + | - | + | - | + | + | + | + |
| BUCP15 | + | - | ND | + | + | ND | + | + | + |
| BUCP16 | - | ND | ND | - | ND | ND | - | - | - |
| BUCP17 | - | - | ND | - | - | ND | - | - | - |
| BUCP18 | - | ND | - | - | ND | - | - | - | + |
| BUCP19 | + | - | - | - | - | + | + | + | + |
| BUCP20 | - | - | ND | - | - | ND | - | - | - |
| BUCP21 | + | ND | ND | - | ND | ND | - | + | + |

Supplementary Table 1 Comparison of Mu recovery from Tika-MGIT cultures and 16S rRNA results at different time points

**The table shows the detection of positive Mu isolates from Tika-MGIT culture media across the different time points (Week 0, Week 2, Week 4) in study participants in comparison with 16S rRNA results. (+) indicates a positive Mu culture, (-) indicates a negative Mu culture due to either contamination or no bacterial growth detection and ND indicates Mu culture not done (lesions had healed or individuals did not attend the scheduled visit)*

Supplementary Table 2 Comparison of Mu recovery from Petroff-MGIT cultures and 16S rRNA result at different time points

|  | **Petroff-MGIT** | | | **Mu16S rRNA result** | | | **Mu 16S rRNA result** | **Final Petroff-MGIT result** | **Final culture result** |
| --- | --- | --- | --- | --- | --- | --- | --- | --- | --- |
| Participant ID | Week 0 | Week 2 | Week 4 | Week 0 | Week 2 | Week 4 |  |  |  |
| BUCP1 | - | + | - | + | + | + | + | + | + |
| BUCP2 | - | - | - | + | + | + | + | - | + |
| BUCP3 | + | ND | ND | + | ND | ND | + | + | + |
| BUCP4 | - | - | ND | - | - | ND | - | - | - |
| BUCP5 | - | - | - | - | + | + | + | - | + |
| BUCP6 | - | ND | ND | - | ND | ND | - | - | - |
| BUCP7 | - | ND | ND | - | ND | ND | - | - | - |
| BUCP8 | + | + | - | - | + | + | + | + | + |
| BUCP9 | + | - | + | - | + | + | + | + | + |
| BUCP10 | - | - | ND | + | + | ND | + | - | + |
| BUCP11 | - | ND | ND | - | ND | ND | - | - | - |
| BUCP12 | - | ND | ND | - | ND | ND | - | - | - |
| BUCP13 | - | - | - | + | + | + | + | - | + |
| BUCP14 | + | + | - | + | - | + | + | + | + |
| BUCP15 | - | - | ND | + | + | ND | + | - | + |
| BUCP16 | - | ND | ND | - | ND | ND | - | - | - |
| BUCP17 | - | - | ND | - | - | ND | - | - | - |
| BUCP18 | - | ND | - | - | ND | - | - | - | + |
| BUCP19 | + | - | + | - | - | + | + | + | + |
| BUCP20 | - | - | ND | - | - | ND | - | - | - |
| BUCP21 | - | ND | ND | - | ND | ND | - | - | + |

**The table shows the detection of positive Mu isolates from Petroff-MGIT culture media across different time points (Week 0, Week 2, Week 4) in study participants in comparison with 16S rRNA results. (+) indicates a positive Mu culture, (-) indicates a negative Mu culture due to either contamination or no bacterial growth detection and ND indicates Mu culture not done (lesions had healed or individuals did not attend the scheduled visit)*

Supplementary Table 3 Comparison of Mu recovery from Petroff-LJ cultures and 16S rRNA result at different time points

|  | **Petroff-LJ** | | | **Mu16S rRNA result** | | | **Mu 16S rRNA result** | **Final Petroff-LJ result** | **Final culture result** |
| --- | --- | --- | --- | --- | --- | --- | --- | --- | --- |
| Participant ID | Week 0 | Week 2 | Week 4 | Week 0 | Week 2 | Week 4 |  |  |  |
| BUCP1 | - | - | - | + | + | + | + | - | + |
| BUCP2 | + | - | + | + | + | + | + | + | + |
| BUCP3 | - | ND | ND | + | ND | ND | + | - | + |
| BUCP4 | - | - | ND | - | - | ND | - | - | - |
| BUCP5 | - | - | - | - | + | + | + | - | + |
| BUCP6 | - | ND | ND | - | ND | ND | - | - | - |
| BUCP7 | - | ND | ND | - | ND | ND | - | - | - |
| BUCP8 | - | - | - | - | + | + | + | - | + |
| BUCP9 | - | - | - | - | + | + | + | - | + |
| BUCP10 | - | - | ND | + | + | ND | + | - | + |
| BUCP11 | - | ND | ND | - | ND | ND | - | - | - |
| BUCP12 | - | ND | ND | - | ND | ND | - | - | - |
| BUCP13 | + | - | - | + | + | + | + | + | + |
| BUCP14 | + | + | - | + | - | + | + | + | + |
| BUCP15 | + | + | ND | + | + | ND | + | + | + |
| BUCP16 | - | ND | ND | - | ND | ND | - | - | - |
| BUCP17 | - | - | ND | - | - | ND | - | - | - |
| BUCP18 | - | ND | + | - | ND | - | - | + | + |
| BUCP19 | - | - | - | - | - | + | + | - | + |
| BUCP20 | - | - | ND | - | - | ND | - | - | - |
| BUCP21 | - | ND | ND | - | ND | ND | - | - | + |

**The table shows the detection of positive Mu isolates from Petroff-LJ culture media across different time points (Week 0, Week 2, Week 4) in study participants in comparison with 16S rRNA results. (+) indicates a positive Mu culture, (-) indicates a negative Mu culture due to either contamination or no bacterial growth detection and ND indicates Mu culture not done (lesions had healed or individuals did not attend the scheduled visit)*

Supplementary Table 4 Comparison of Mu culture recovery from Tika-MGIT, Petroff-MGIT and Petroff-LJ with Mu 16S rRNA results at Baseline (Week 0)

| Participant ID | Tika-MGIT | Petroff-MGIT | Petroff-LJ | Final culture result at Week 0 | Mu 16S rRNA |
| --- | --- | --- | --- | --- | --- |
| BUCP1 | - | - | - | - | + |
| BUCP2 | + | - | + | + | + |
| BUCP3 | - | + | - | + | + |
| BUCP4 | - | - | - | - | - |
| BUCP5 | + | - | - | + | - |
| BUCP6 | - | - | - | - | - |
| BUCP7 | - | - | - | - | - |
| BUCP8 | + | + | - | + | - |
| BUCP9 | - | + | - | + | - |
| BUCP10 | + | - | - | + | + |
| BUCP11 | - | - | - | - | - |
| BUCP12 | - | - | - | - | - |
| BUCP13 | + | - | + | + | + |
| BUCP14 | - | + | + | + | + |
| BUCP15 | + | - | + | + | + |
| BUCP16 | - | - | - | - | - |
| BUCP17 | - | - | - | - | - |
| BUCP18 | - | - | - | - | - |
| BUCP19 | + | + | - | + | - |
| BUCP20 | - | - | - | - | - |
| BUCP21 | + | - | - | + | - |

**The table shows the detection of positive Mu isolates from different culture media at baseline (Week 0) in comparison with 16S rRNA results. (+) indicates a positive Mu culture, (-) indicates a negative Mu culture due to either contamination or no bacterial growth detection*

Supplementary Table 5 Comparison of Mu culture recovery from Tika-MGIT, Petroff-MGIT and Petroff-LJ with Mu 16S rRNA results at Week 2

| Participant ID | Tika-MGIT | Petroff-MGIT | Petroff-LJ | Final culture result at Week 2 | Mu 16S rRNA |
| --- | --- | --- | --- | --- | --- |
| BUCP1 | - | + | - | + | + |
| BUCP2 | + | - | - | + | + |
| BUCP3 | ND | ND | ND | ND | ND |
| BUCP4 | - | - | - | - | - |
| BUCP5 | + | - | - | + | + |
| BUCP6 | ND | ND | ND | ND | ND |
| BUCP7 | ND | ND | ND | ND | ND |
| BUCP8 | + | + | - | + | + |
| BUCP9 | - | - | - | - | + |
| BUCP10 | - | - | - | - | + |
| BUCP11 | ND | ND | ND | ND | ND |
| BUCP12 | ND | ND | ND | ND | ND |
| BUCP13 | - | - | - | - | + |
| BUCP14 | + | + | + | + | - |
| BUCP15 | - | - | + | + | + |
| BUCP16 | ND | ND | ND | ND | ND |
| BUCP17 | - | - | - | - | - |
| BUCP18 | ND | ND | ND | ND | ND |
| BUCP19 | - | - | - | - | - |
| BUCP20 | - | - | - | - | - |
| BUCP21 | ND | ND | ND | ND | ND |

**The table shows the detection of positive Mu isolates from different culture media at Week 2 in comparison with 16S rRNA results. (+) indicates a positive Mu culture, (-) indicates a negative Mu culture due to either contamination or no bacterial growth detection and ND indicates Mu culture not done (lesions had healed or individuals did not attend the scheduled visit)*

Supplementary Table 6 Comparison of Mu culture recovery from Tika-MGIT, Petroff-MGIT and Petroff-LJ Mu 16S rRNA results at Week 4

| Participant ID | Tika-MGIT | Petroff-MGIT | Petroff-LJ | Final culture result at Week 4 | Mu 16S rRNA |
| --- | --- | --- | --- | --- | --- |
| BUCP1 | + | - | - | + | + |
| BUCP2 | - | - | + | + | + |
| BUCP3 | ND | ND | ND | ND | ND |
| BUCP4 | ND | ND | ND | ND | ND |
| BUCP5 | - | - | - | - | + |
| BUCP6 | ND | ND | ND | ND | ND |
| BUCP7 | ND | ND | ND | ND | ND |
| BUCP8 | - | - | - | - | + |
| BUCP9 | - | + | - | + | + |
| BUCP10 | ND | ND | ND | ND | ND |
| BUCP11 | ND | ND | ND | ND | ND |
| BUCP12 | ND | ND | ND | ND | ND |
| BUCP13 | + | - | - | + | + |
| BUCP14 | - | - | - | - | + |
| BUCP15 | ND | ND | ND | ND | ND |
| BUCP16 | ND | ND | ND | ND | ND |
| BUCP17 | ND | ND | ND | ND | ND |
| BUCP18 | - | - | + | + | - |
| BUCP19 | - | + | - | + | + |
| BUCP20 | ND | ND | ND | ND | ND |
| BUCP21 | ND | ND | ND | ND | ND |

**The table shows the detection of positive Mu isolates from different culture media at Week 4 in comparison with 16S rRNA results. (+) indicates a positive Mu culture, (-) indicates a negative Mu culture due to either contamination or no bacterial growth detection and ND indicates Mu culture not done (lesions had healed or individuals did not attend the scheduled visit)*

Supplementary Table 7 Concordance between culture results and the 16S rRNA assay at different time points

|  | Week 0 | Week 2 | Week 4 | Overall |
| --- | --- | --- | --- | --- |
| Tika-MGIT | 14/21 (66.7%) | 7/13 (53.8%) | 3/9 (33.3%) | 18/21 (85.7%) |
| Petroff- MGIT | 13/21 (61.9%) | 6/13 (46.2%) | 3/9 (33.3%) | 16/21 (76.2%) |
| Petroff-LJ | 18/21 (85.7%) | 5/13 (38.5%) | 1/9 (11.1%) | 13/21 (61.9%) |
| Overall | 15/21 (71.4%) | 9/13 (69.2%) | 5/9 (55.6%) | 19/21 (90.5%) |

**This table compares the culture results with the 16S rRNA assays for all culture methods at different time points to determine the concordance between the assays. The overall comparison was for all time points and all culture methods.*

Supplementary Table 8 Comparison of contamination of culture media at different

time points

|  | **Tika-MGIT** | | | **Petroff-MGIT** | | | **Petroff-LJ** | | |
| --- | --- | --- | --- | --- | --- | --- | --- | --- | --- |
| Participant ID | Week 0 | Week 2 | Week 4 | Week 0 | Week 2 | Week 4 | Week 0 | Week 2 | Week 4 |
| BUCP1 | - | - | - | - | - | - | - | - | - |
| BUCP2 | - | - | - | - | - | - | - | + | - |
| BUCP3 | - | ND | ND | - | ND | ND | + | ND | ND |
| BUCP4 | - | - | ND | - | - | ND | - | - | ND |
| BUCP5 | - | - | - | - | - | - | - | - | - |
| BUCP6 | + | ND | ND | - | ND | ND | - | ND | ND |
| BUCP7 | + | ND | ND | - | ND | ND | - | ND | ND |
| BUCP8 | - | - | - | - | + | - | + | - | + |
| BUCP9 | - | - | - | - | + | - | - | - | - |
| BUCP10 | - | - | ND | - | - | ND | + | + | ND |
| BUCP11 | + | ND | ND | - | ND | ND | + | ND | ND |
| BUCP12 | - | ND | ND | - | ND | ND | + | ND | ND |
| BUCP13 | - | - | - | - | + | - | - | + | + |
| BUCP14 | - | - | - | - | - | - | - | - | - |
| BUCP15 | - | - | ND | - | - | ND | - | - | ND |
| BUCP16 | + | ND | ND | - | ND | ND | - | ND | ND |
| BUCP17 | + | - | ND | - | - | ND | - | - | ND |
| BUCP18 | - | ND | - | - | ND | - | - | ND | - |
| BUCP19 | - | - | + | + | - | - | - | - | + |
| BUCP20 | - | + | ND | + | - | ND | - | - | ND |
| BUCP21 | - | ND | ND | + | ND | ND | - | ND | ND |

**The table shows detection of contamination of the different culture media across the different time points in study participants. (+) indicates presence of contamination, (-) indicates absence of contamination, ND indicates culture not done.*
